# Supplementary material for: Heterozygous De Novo Truncating Mutation of Nucleolin in an ASD Individual Disrupts Its Nucleolar Localization
Source: MDPI journal article supplement (doi:10.3390/genes13010051), 2021-12-24

**Supplementary Materials:**

**Figure S1. Co-localization of exogenous NCL-GFP (wild type (WT), and mutants (p.G664Efs and p.G664\*)) with endogenous nucleolar protein B23 (Cy3), after transfection in HEK293T cells.**  
Cells were probed with anti-B23 antibody along with Cy3-labelled secondary anti-IgG antibody.

Supplementary Figure S1

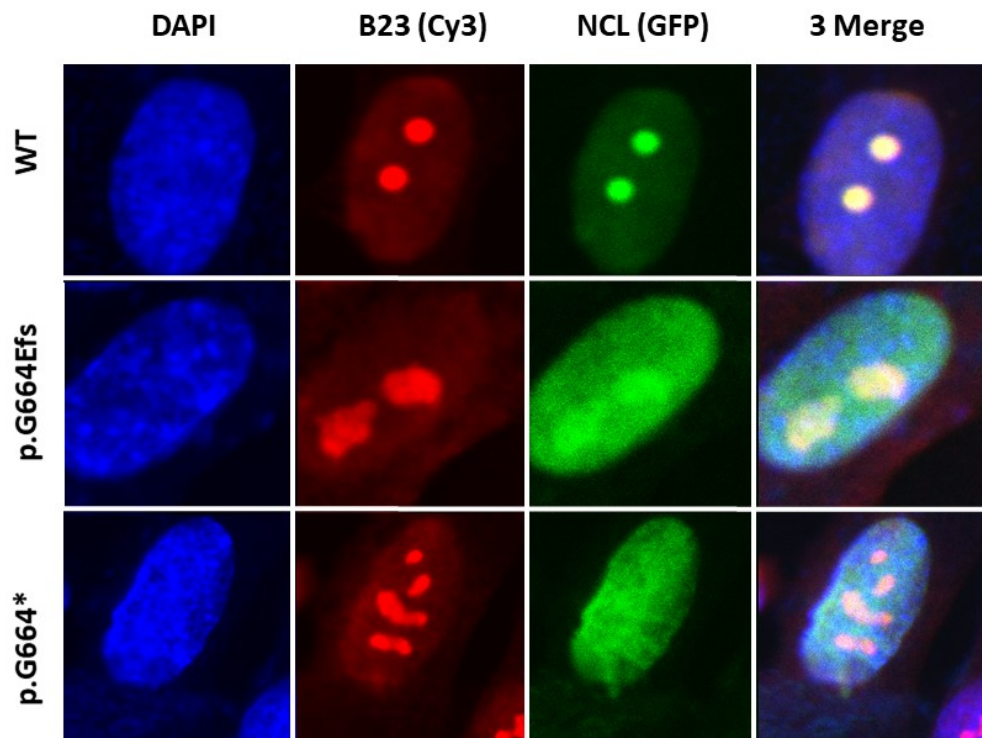

Supplement: s1 [file s1]
